# Supplementary material
Source: Springer Nature journal article supplement (https://www.springermedizin.de/resource/supplementary/12887_2011_549_MOESM2_ESM.pdf/9475544)

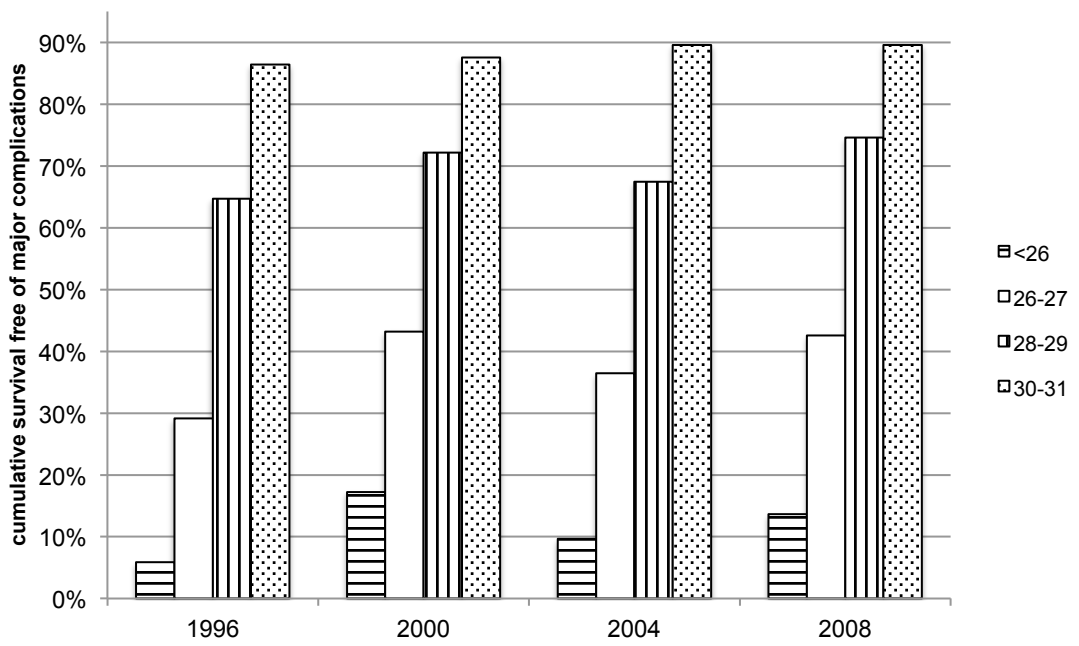

| GA (weeks) | p-value<br>96-00 | p-value<br>00-04 | p-value<br>04-08 | p-value<br>96-08 | regression<br>coeff. $\beta$ |
|------------|------------------|------------------|------------------|------------------|------------------------------|
| <26        | <0.001           | 0.07             | 0.20             | <0.01            | 1.6%                         |
| 26-27      | <0.001           | 0.12             | 0.13             | <0.001           | 3.3%                         |
| 28-29      | 0.03             | 0.16             | 0.04             | <0.01            | 2.5%                         |
| 30-31      | 0.59             | 0.17             | 0.75             | 0.05             | 1.2%                         |

Supplement: MOESM2 [file 9475544]
